# Supplementary material for: Excessive aggregation of membrane proteins in the Martini model
Source: PubMed Central journal article supplement (PMC5683612; doi:10.1371/journal.pone.0187936), 2017-11-13

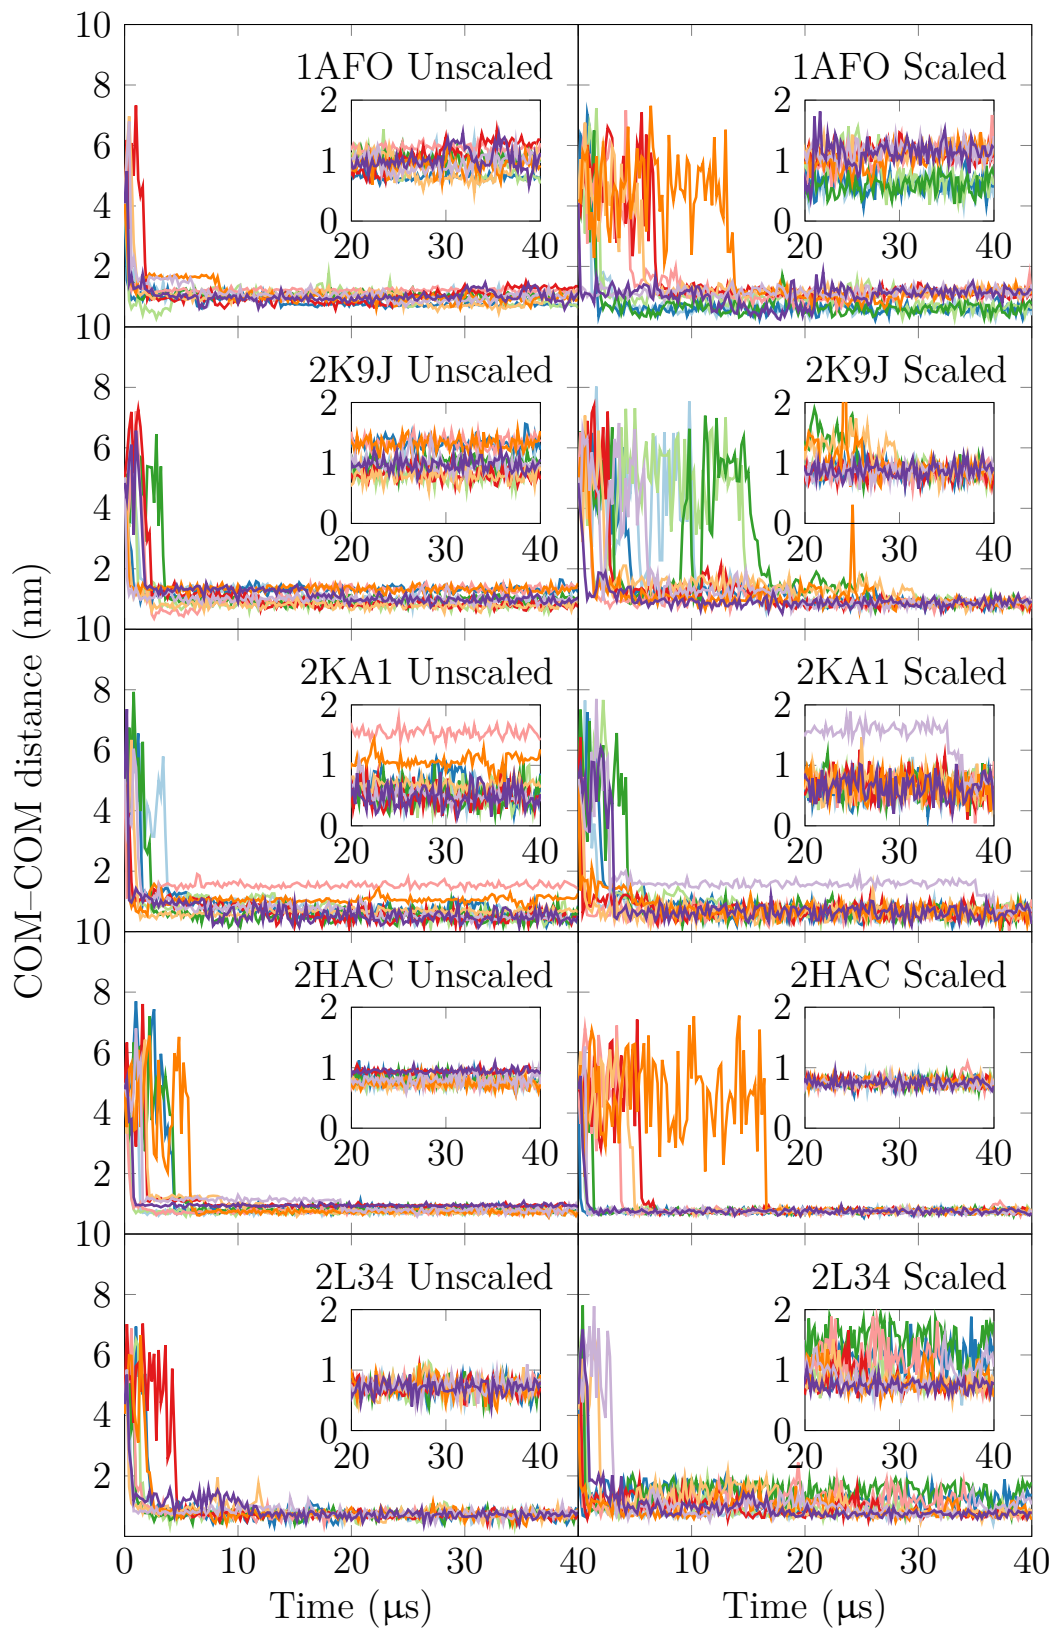

Supplement: pone.0187936.s003.pdf [file pone.0187936.s003.pdf]
